# Supplementary figures and images for: Unbiased analysis of peripheral blood mononuclear cells reveals CD4 T cell response to RSV matrix protein
Source: PubMed Central journal article supplement — Vaccine X. 2020 Apr 21;5:100065. doi: 10.1016/j.jvacx.2020.100065 (PMC7280769; doi:10.1016/j.jvacx.2020.100065), 2020-04-21

■ Mild ■ Severe ■ Visit 1 ■ Visit 2 ■ Visit 3

A)

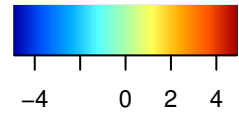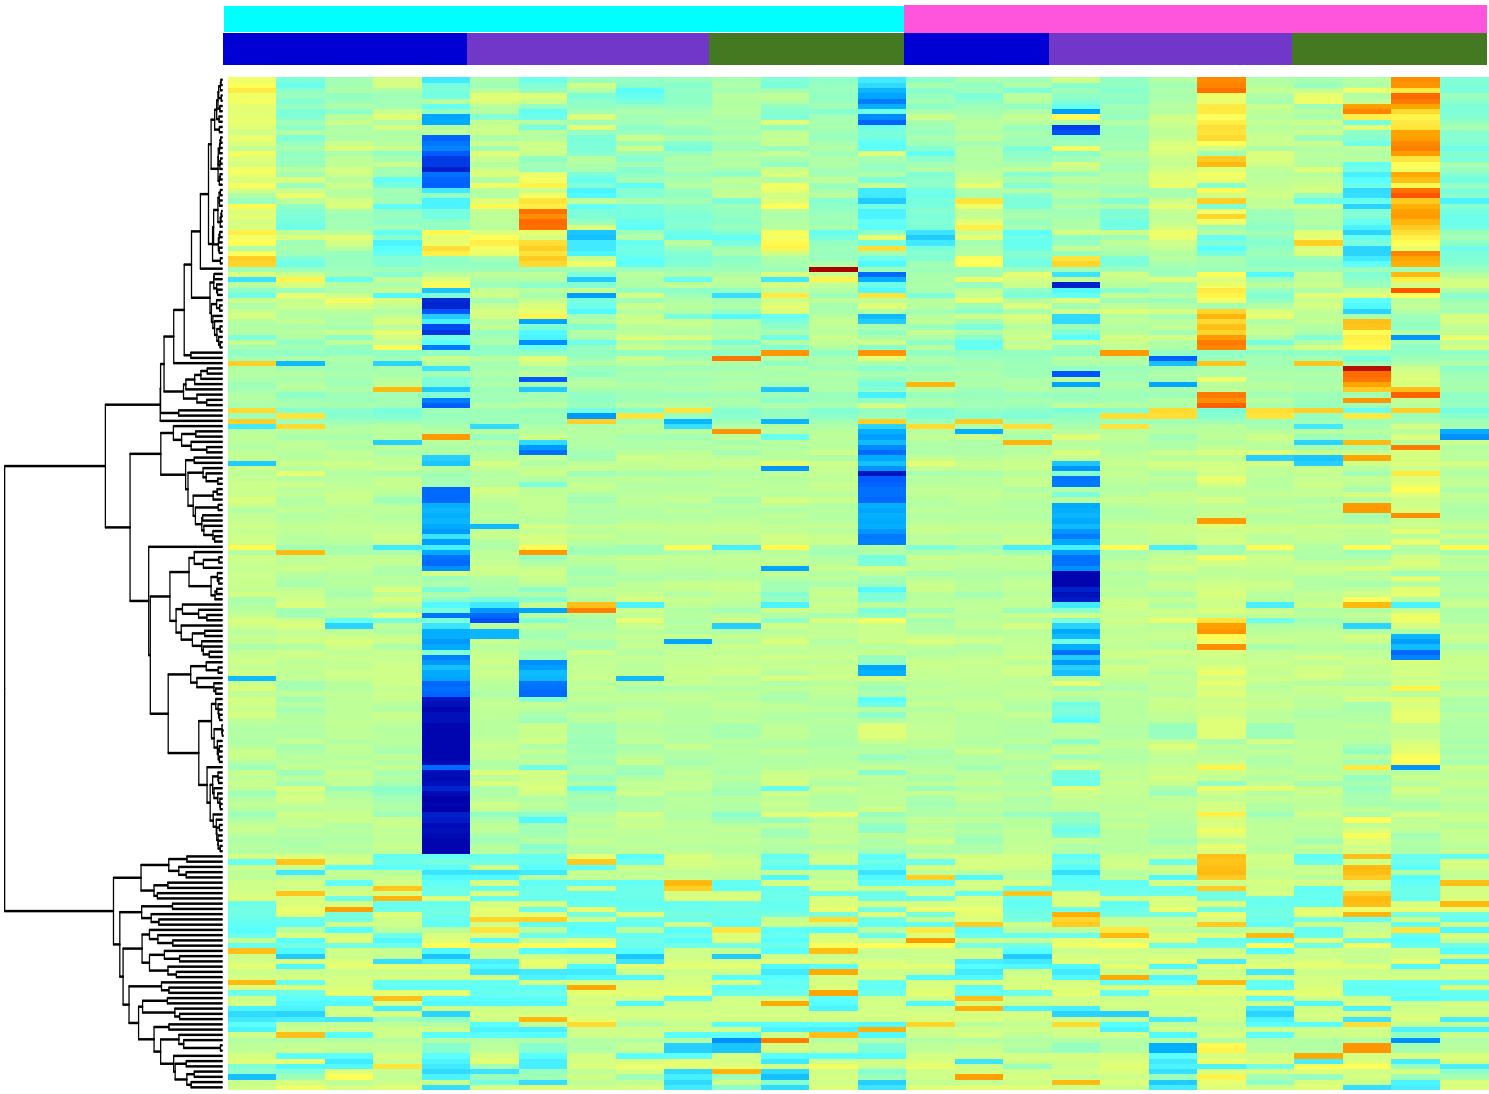

B)

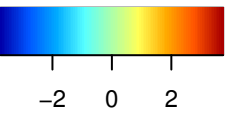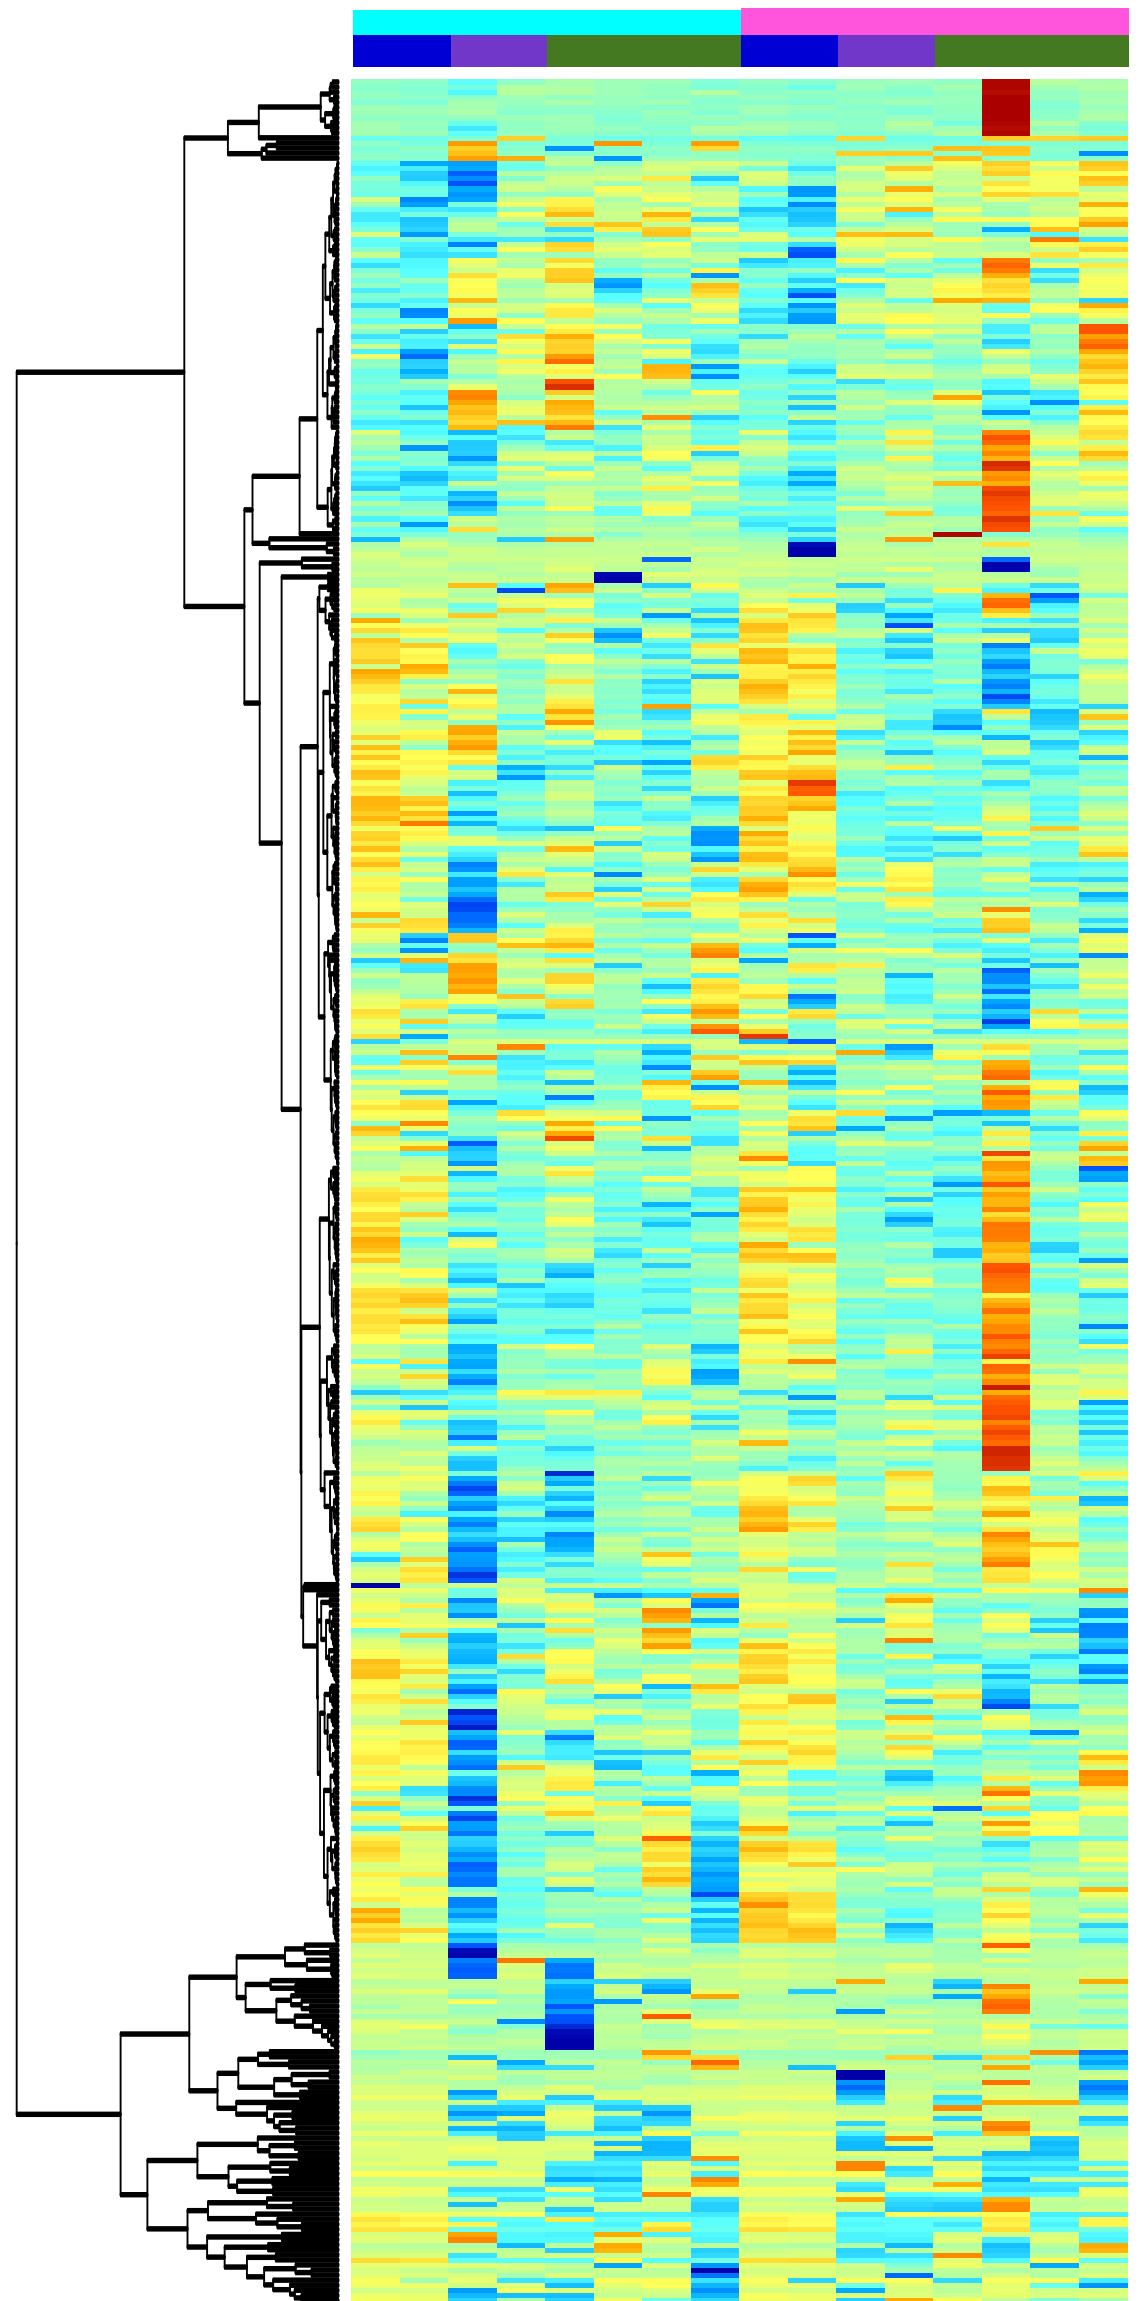

Supplement: mmc1.pdf [file mmc1.pdf]

**A)**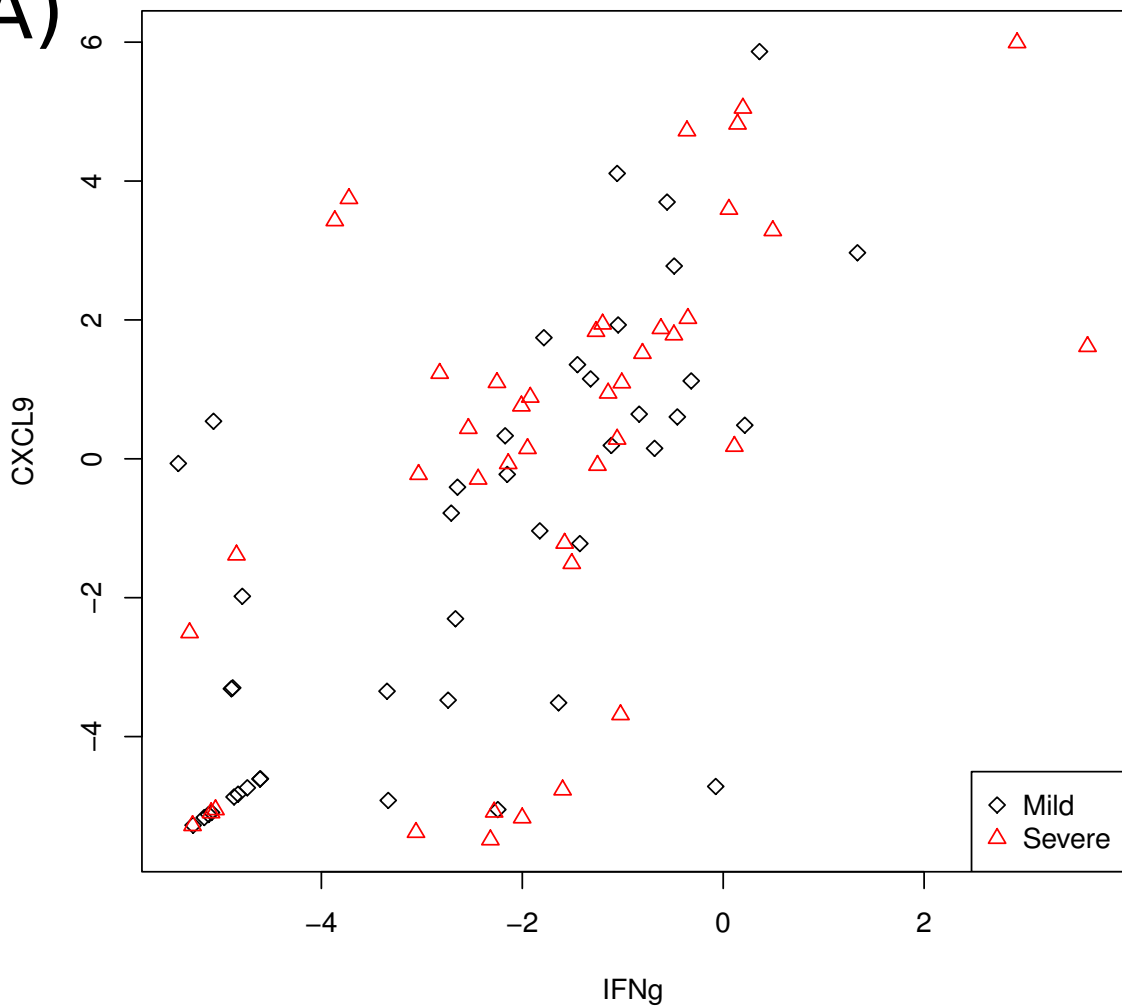**B)**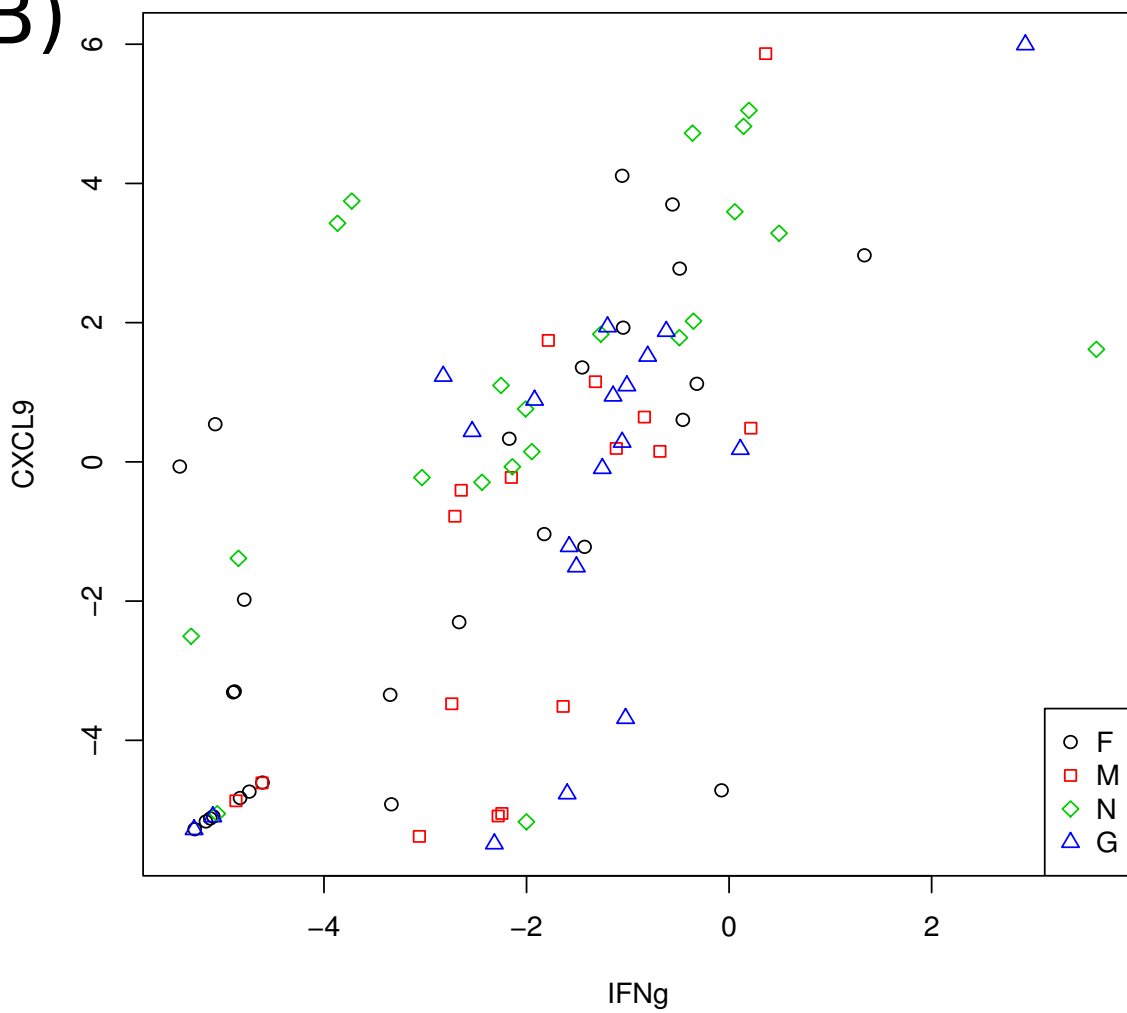

Supplement: mmc2.pdf [file mmc2.pdf]
